# Supplementary material
Source: publisher figshare collection journal article supplement (https://acs.figshare.com/ndownloader/files/3712477)
Supplement: Supplementary file 1 [file 3712477]

 
data_sad 
 
_audit_creation_method            SHELXL-97 
_chemical_name_systematic 
; 
 ? 
; 
_chemical_name_common             ? 
_chemical_melting_point           'not measured'  
_chemical_formula_moiety          'C46 H48 Ce Cu4 I4 N3 O13' 
_chemical_formula_sum 
 'C46 H48 Ce Cu4 I4 N3 O13' 
_chemical_formula_weight          1752.75 
 
loop_ 
 _atom_type_symbol 
 _atom_type_description 
 _atom_type_scat_dispersion_real 
 _atom_type_scat_dispersion_imag 
 _atom_type_scat_source 
 'C'  'C'   0.0033   0.0016 
 'International Tables Vol C Tables 4.2.6.8 and 6.1.1.4' 
 'H'  'H'   0.0000   0.0000 
 'International Tables Vol C Tables 4.2.6.8 and 6.1.1.4' 
 'N'  'N'   0.0061   0.0033 
 'International Tables Vol C Tables 4.2.6.8 and 6.1.1.4' 
 'O'  'O'   0.0106   0.0060 
 'International Tables Vol C Tables 4.2.6.8 and 6.1.1.4' 
 'Cu'  'Cu'   0.3201   1.2651 
 'International Tables Vol C Tables 4.2.6.8 and 6.1.1.4' 
 'I'  'I'  -0.4742   1.8119 
 'International Tables Vol C Tables 4.2.6.8 and 6.1.1.4' 
 'Ce'  'Ce'  -0.2486   2.6331 
 'International Tables Vol C Tables 4.2.6.8 and 6.1.1.4' 
 
_symmetry_cell_setting            triclinic
_symmetry_space_group_name_H-M    p-1 
 
loop_ 
 _symmetry_equiv_pos_as_xyz 
 'x, y, z' 
 '-x, -y, -z' 
 
_cell_length_a                    9.758(2) 
_cell_length_b                    16.575(3) 
_cell_length_c                    21.452(4) 
_cell_angle_alpha                 104.13(3) 
_cell_angle_beta                  100.68(3) 
_cell_angle_gamma                 96.53(3) 
_cell_volume                      3260.0(11) 
_cell_formula_units_Z             2 
_cell_measurement_temperature     293(2) 
_cell_measurement_reflns_used     ? 
_cell_measurement_theta_min       ? 
_cell_measurement_theta_max       ? 
 
_exptl_crystal_description        block 
_exptl_crystal_colour             colourless
_exptl_crystal_size_max           0.22 
_exptl_crystal_size_mid           0.20 
_exptl_crystal_size_min           0.19 
_exptl_crystal_density_meas       none 
_exptl_crystal_density_diffrn     1.786 
_exptl_crystal_density_method     'not measured' 
_exptl_crystal_F_000              1670 
_exptl_absorpt_coefficient_mu     3.913 
_exptl_absorpt_correction_type    empirical 
_exptl_absorpt_correction_T_min   0.4417
_exptl_absorpt_correction_T_max   0.4810
_exptl_absorpt_process_details    'Process-auto'
 
_exptl_special_details 
; 
 ? 
; 
 
_diffrn_ambient_temperature       293(2) 
_diffrn_radiation_wavelength      0.71073 
_diffrn_radiation_type            MoK\a 
_diffrn_radiation_source          'fine-focus sealed tube' 
_diffrn_radiation_monochromator   graphite 
_diffrn_measurement_device_type   'Rigaku RAXIS-RAPID' 
_diffrn_measurement_method        omega-scan 
_diffrn_detector_area_resol_mean  '10.0' 
_diffrn_standards_number          0 
_diffrn_standards_interval_count  0 
_diffrn_standards_interval_time   0 
_diffrn_standards_decay_%         0 
_diffrn_reflns_number             30388 
_diffrn_reflns_av_R_equivalents   0.0761 
_diffrn_reflns_av_sigmaI/netI     0.1142 
_diffrn_reflns_limit_h_min        -12 
_diffrn_reflns_limit_h_max        12 
_diffrn_reflns_limit_k_min        -20 
_diffrn_reflns_limit_k_max        21 
_diffrn_reflns_limit_l_min        -27 
_diffrn_reflns_limit_l_max        27 
_diffrn_reflns_theta_min          3.00 
_diffrn_reflns_theta_max          27.44 
_reflns_number_total              14331 
_reflns_number_gt                 8264 
_reflns_threshold_expression      >2sigma(I) 
 
_computing_data_collection        'Process-auto' 
_computing_cell_refinement        'Process-auto' 
_computing_data_reduction         'Process-auto'
_computing_structure_solution     'SHELXS-97 (Sheldrick, 1990)' 
_computing_structure_refinement   'SHELXL-97 (Sheldrick, 1997)' 
_computing_molecular_graphics     ? 
_computing_publication_material   ?  
 
_refine_special_details 
; 
 Refinement of F^2^ against ALL reflections.  The weighted R-factor wR and 
 goodness of fit S are based on F^2^, conventional R-factors R are based 
 on F, with F set to zero for negative F^2^. The threshold expression of 
 F^2^ > 2sigma(F^2^) is used only for calculating R-factors(gt) etc. and is 
 not relevant to the choice of reflections for refinement.  R-factors based 
 on F^2^ are statistically about twice as large as those based on F, and R- 
 factors based on ALL data will be even larger. To improve the parameters
chemical more reasonable,ultimately restrain instructions were applied in 
the refinement. The bond lengths and angles of solvent molecule were adjusted. 
The occupancy and vibration of solvent molecule were restrained.structures 
were then refined again using the generated data.
; 
 
_refine_ls_structure_factor_coef  Fsqd  
_refine_ls_matrix_type            full 
_refine_ls_weighting_scheme       calc  
_refine_ls_weighting_details 
 'calc w=1/[\s^2^(Fo^2^)+(0.0884P)^2^+33.7623P] where P=(Fo^2^+2Fc^2^)/3' 
_atom_sites_solution_primary      direct 
_atom_sites_solution_secondary    difmap 
_atom_sites_solution_hydrogens    geom 
_refine_ls_hydrogen_treatment     mixed 
_refine_ls_extinction_method      none 
_refine_ls_extinction_coef        ? 
_refine_ls_number_reflns          14331 
_refine_ls_number_parameters      613 
_refine_ls_number_restraints      244 
_refine_ls_R_factor_all           0.1376 
_refine_ls_R_factor_gt            0.0752 
_refine_ls_wR_factor_ref          0.2218 
_refine_ls_wR_factor_gt           0.1929 
_refine_ls_goodness_of_fit_ref    1.021 
_refine_ls_restrained_S_all       1.016 
_refine_ls_shift/su_max           0.001 
_refine_ls_shift/su_mean          0.000 
 
loop_ 
 _atom_site_label 
 _atom_site_type_symbol 
 _atom_site_fract_x 
 _atom_site_fract_y 
 _atom_site_fract_z 
 _atom_site_U_iso_or_equiv 
 _atom_site_adp_type 
 _atom_site_occupancy 
 _atom_site_symmetry_multiplicity 
 _atom_site_calc_flag 
 _atom_site_refinement_flags 
 _atom_site_disorder_assembly 
 _atom_site_disorder_group 
Ce1 Ce 0.27720(6) 0.51746(4) -0.00173(3) 0.03170(18) Uani 1 1 d D . . 
I1 I 0.76373(9) 0.99164(6) 0.50025(5) 0.0475(2) Uani 1 1 d . . . 
I2 I 0.98493(9) 0.77848(6) 0.46957(4) 0.0475(2) Uani 1 1 d . . . 
I3 I 1.08712(9) 0.97835(7) 0.67145(5) 0.0550(3) Uani 1 1 d . . . 
I4 I 0.70094(10) 0.78769(6) 0.61220(5) 0.0547(3) Uani 1 1 d . . . 
Cu1 Cu 1.01258(18) 0.94228(11) 0.53908(9) 0.0523(4) Uani 1 1 d . . . 
Cu2 Cu 0.75388(18) 0.82695(12) 0.50223(9) 0.0538(5) Uani 1 1 d . . . 
Cu3 Cu 0.82017(19) 0.94511(13) 0.62078(10) 0.0657(6) Uani 1 1 d . . . 
Cu4 Cu 0.96305(19) 0.81685(12) 0.59713(9) 0.0545(5) Uani 1 1 d . . . 
O1 O 0.1732(9) 0.5493(6) 0.0943(4) 0.052(2) Uani 1 1 d . . . 
O2 O -0.0541(9) 0.4892(6) 0.0751(4) 0.049(2) Uani 1 1 d . . . 
O3 O 0.5438(9) 1.3703(6) 0.9264(5) 0.053(2) Uani 1 1 d . . . 
O4 O 0.3243(9) 1.4052(6) 0.9120(4) 0.047(2) Uani 1 1 d . . . 
O5 O 1.3550(10) 0.5871(6) 0.9188(4) 0.052(2) Uani 1 1 d . . . 
O6 O 1.5688(10) 0.5499(7) 0.9372(5) 0.056(3) Uani 1 1 d . . . 
O7 O 0.1193(10) 0.3813(6) -0.0055(6) 0.071(3) Uani 1 1 d D . . 
O8 O 0.1941(12) 0.6688(6) 0.0115(6) 0.068(3) Uani 1 1 d D . . 
N1 N 0.5782(11) 0.7631(7) 0.4349(5) 0.045(3) Uani 1 1 d . . . 
N2 N 0.7056(11) 1.0261(8) 0.6661(6) 0.055(3) Uani 1 1 d . . . 
N3 N 1.0979(12) 0.7499(8) 0.6375(6) 0.052(3) Uani 1 1 d . . . 
C1 C 0.4528(16) 0.7862(10) 0.4383(7) 0.062(4) Uani 1 1 d . . . 
H1 H 0.4494 0.8347 0.4703 0.074 Uiso 1 1 calc R . . 
C2 C 0.3279(13) 0.7417(9) 0.3965(7) 0.052(4) Uani 1 1 d . . . 
H2 H 0.2424 0.7580 0.4031 0.063 Uiso 1 1 calc R . . 
C3 C 0.3289(13) 0.6721(9) 0.3444(6) 0.049(3) Uani 1 1 d . . . 
C4 C 0.4599(13) 0.6483(9) 0.3402(7) 0.052(4) Uani 1 1 d . . . 
H4 H 0.4675 0.6011 0.3079 0.062 Uiso 1 1 calc R . . 
C5 C 0.5786(13) 0.6966(9) 0.3854(7) 0.048(3) Uani 1 1 d . . . 
H5 H 0.6658 0.6814 0.3807 0.057 Uiso 1 1 calc R . . 
C6 C 0.1964(12) 0.6232(8) 0.2980(6) 0.040(3) Uani 1 1 d . . . 
C7 C 0.1908(11) 0.5971(7) 0.2308(5) 0.031(2) Uani 1 1 d . . . 
H7 H 0.2716 0.6089 0.2154 0.037 Uiso 1 1 calc R . . 
C8 C 0.0674(12) 0.5538(7) 0.1863(6) 0.034(3) Uani 1 1 d . . . 
C9 C -0.0531(11) 0.5318(8) 0.2098(6) 0.037(3) Uani 1 1 d . . . 
H9 H -0.1345 0.4995 0.1806 0.045 Uiso 1 1 calc R . . 
C10 C -0.0501(14) 0.5578(8) 0.2757(6) 0.044(3) Uani 1 1 d . . . 
H10 H -0.1298 0.5435 0.2912 0.053 Uiso 1 1 calc R . . 
C11 C 0.0706(12) 0.6053(9) 0.3192(6) 0.043(3) Uani 1 1 d . . . 
H11 H 0.0691 0.6259 0.3634 0.052 Uiso 1 1 calc R . . 
C12 C 0.0605(11) 0.5274(8) 0.1142(5) 0.035(3) Uani 1 1 d . . . 
C13 C 0.7601(14) 1.1038(10) 0.7087(7) 0.057(4) Uani 1 1 d . . . 
H13 H 0.8579 1.1199 0.7207 0.068 Uiso 1 1 calc R . . 
C14 C 0.6806(14) 1.1573(8) 0.7337(7) 0.048(3) Uani 1 1 d . . . 
H14 H 0.7241 1.2086 0.7636 0.058 Uiso 1 1 calc R . . 
C15 C 0.5317(12) 1.1386(8) 0.7163(6) 0.038(3) Uani 1 1 d . . . 
C16 C 0.4730(14) 1.0564(9) 0.6703(7) 0.057(4) Uani 1 1 d . . . 
H16 H 0.3759 1.0387 0.6556 0.069 Uiso 1 1 calc R . . 
C17 C 0.5664(15) 1.0064(9) 0.6497(8) 0.069(5) Uani 1 1 d . . . 
H17 H 0.5284 0.9532 0.6214 0.082 Uiso 1 1 calc R . . 
C18 C 0.4333(14) 1.1944(8) 0.7406(6) 0.042(3) Uani 1 1 d . . . 
C19 C 0.4718(13) 1.2543(8) 0.8032(6) 0.040(3) Uani 1 1 d . . . 
H19 H 0.5625 1.2610 0.8289 0.048 Uiso 1 1 calc R . . 
C20 C 0.3772(11) 1.3025(7) 0.8265(6) 0.031(2) Uani 1 1 d . . . 
C21 C 0.2441(14) 1.2943(8) 0.7870(7) 0.049(4) Uani 1 1 d . . . 
H21 H 0.1793 1.3263 0.8029 0.059 Uiso 1 1 calc R . . 
C22 C 0.2057(15) 1.2399(9) 0.7247(7) 0.057(4) Uani 1 1 d . . . 
H22 H 0.1179 1.2376 0.6980 0.068 Uiso 1 1 calc R . . 
C23 C 0.2982(14) 1.1883(9) 0.7018(7) 0.047(3) Uani 1 1 d . . . 
H23 H 0.2705 1.1496 0.6605 0.056 Uiso 1 1 calc R . . 
C24 C 0.4176(13) 1.3638(8) 0.8930(6) 0.043(3) Uani 1 1 d . . . 
C25 C 1.2382(18) 0.7677(14) 0.6366(9) 0.083(6) Uani 1 1 d . . . 
H25 H 1.2665 0.8054 0.6139 0.099 Uiso 1 1 calc R . . 
C26 C 1.3382(16) 0.7303(11) 0.6689(8) 0.066(5) Uani 1 1 d . . . 
H26 H 1.4317 0.7405 0.6653 0.079 Uiso 1 1 calc R . . 
C27 C 1.3009(14) 0.6777(8) 0.7069(7) 0.044(3) Uani 1 1 d . . . 
C28 C 1.1596(13) 0.6624(10) 0.7073(7) 0.052(4) Uani 1 1 d . . . 
H28 H 1.1299 0.6283 0.7325 0.063 Uiso 1 1 calc R . . 
C29 C 1.0641(16) 0.6952(10) 0.6725(8) 0.058(4) Uani 1 1 d . . . 
H29 H 0.9692 0.6798 0.6721 0.069 Uiso 1 1 calc R . . 
C30 C 1.4103(13) 0.6393(9) 0.7434(7) 0.046(3) Uani 1 1 d . . . 
C31 C 1.3918(12) 0.6239(8) 0.8029(6) 0.041(3) Uani 1 1 d . . . 
H31 H 1.3105 0.6348 0.8180 0.049 Uiso 1 1 calc R . . 
C32 C 1.4953(13) 0.5921(8) 0.8396(6) 0.040(3) Uani 1 1 d . . . 
C33 C 1.6169(14) 0.5758(9) 0.8189(7) 0.052(4) Uani 1 1 d . . . 
H33 H 1.6885 0.5588 0.8453 0.062 Uiso 1 1 calc R . . 
C34 C 1.6308(17) 0.5859(11) 0.7549(8) 0.069(5) Uani 1 1 d . . . 
H34 H 1.7082 0.5703 0.7382 0.083 Uiso 1 1 calc R . . 
C35 C 1.5305(16) 0.6182(10) 0.7188(8) 0.060(4) Uani 1 1 d U . . 
H35 H 1.5413 0.6262 0.6785 0.072 Uiso 1 1 calc R . . 
C36 C 1.4724(13) 0.5750(8) 0.9032(6) 0.036(3) Uani 1 1 d U . . 
H7A H 0.030(7) 0.376(2) 0.011(5) 0.043 Uiso 1 1 d D . . 
H7B H 0.129(8) 0.3217(10) -0.025(6) 0.043 Uiso 1 1 d D . . 
H8A H 0.187(12) 0.704(3) 0.0527(18) 0.043 Uiso 1 1 d D . . 
H8B H 0.194(13) 0.698(4) -0.022(3) 0.043 Uiso 1 1 d D . . 
O9 O 1.159(2) 0.4661(12) 0.4376(9) 0.145(4) Uani 1 1 d DU . . 
C37 C 1.293(3) 0.5049(16) 0.4366(12) 0.145(4) Uani 1 1 d DU . . 
H37A H 1.2882 0.5232 0.3967 0.174 Uiso 1 1 calc R . . 
H37B H 1.3581 0.4648 0.4365 0.174 Uiso 1 1 calc R . . 
C38 C 1.345(3) 0.5770(16) 0.4937(11) 0.145(4) Uani 1 1 d DU . . 
H38A H 1.4351 0.6061 0.4911 0.174 Uiso 1 1 calc R . . 
H38B H 1.2784 0.6163 0.4954 0.174 Uiso 1 1 calc R . . 
O10 O 1.362(2) 0.5467(12) 0.5511(9) 0.145(4) Uani 1 1 d DU . . 
C39 C 1.232(3) 0.5014(17) 0.5566(12) 0.145(4) Uani 1 1 d DU . . 
H39A H 1.1663 0.5400 0.5664 0.174 Uiso 1 1 calc R . . 
H39B H 1.2503 0.4747 0.5921 0.174 Uiso 1 1 calc R . . 
C40 C 1.171(3) 0.4381(16) 0.4950(11) 0.145(4) Uani 1 1 d DU . . 
H40A H 1.2288 0.3938 0.4911 0.174 Uiso 1 1 calc R . . 
H40B H 1.0780 0.4133 0.4969 0.174 Uiso 1 1 calc R . . 
O11 O 0.307(4) 0.085(2) -0.0793(18) 0.141(6) Uani 0.50 1 d PDU . . 
C41 C 0.375(4) 0.163(3) -0.039(2) 0.141(6) Uani 0.50 1 d PDU . . 
H41A H 0.4176 0.1950 -0.0650 0.170 Uiso 0.50 1 calc PR . . 
H41B H 0.4494 0.1563 -0.0050 0.170 Uiso 0.50 1 calc PR . . 
C42 C 0.274(5) 0.208(3) -0.0095(18) 0.141(6) Uani 0.50 1 d PDU . . 
H42A H 0.2282 0.1756 0.0149 0.170 Uiso 0.50 1 calc PR . . 
H42B H 0.3226 0.2618 0.0208 0.170 Uiso 0.50 1 calc PR . . 
O12 O 0.174(4) 0.222(2) -0.0601(19) 0.141(6) Uani 0.50 1 d PDU . . 
C43 C 0.089(4) 0.146(3) -0.102(2) 0.141(6) Uani 0.50 1 d PDU . . 
H43A H 0.0420 0.1562 -0.1426 0.170 Uiso 0.50 1 calc PR . . 
H43B H 0.0181 0.1266 -0.0805 0.170 Uiso 0.50 1 calc PR . . 
C44 C 0.177(4) 0.085(3) -0.116(2) 0.141(6) Uani 0.50 1 d PDU . . 
H44A H 0.1207 0.0313 -0.1187 0.170 Uiso 0.50 1 calc PR . . 
H44B H 0.1905 0.0821 -0.1598 0.170 Uiso 0.50 1 calc PR . . 
O13 O 1.145(4) 0.729(2) 0.889(2) 0.160(7) Uani 0.50 1 d PDU . . 
C45 C 1.204(4) 0.814(3) 0.905(3) 0.160(7) Uani 0.50 1 d PDU . . 
H45A H 1.2971 0.8196 0.8961 0.192 Uiso 0.50 1 calc PR . . 
H45B H 1.2123 0.8383 0.9522 0.192 Uiso 0.50 1 calc PR . . 
C46 C 1.112(5) 0.856(3) 0.867(3) 0.160(7) Uani 0.50 1 d PDU . . 
H46A H 1.1556 0.9143 0.8735 0.192 Uiso 0.50 1 calc PR . . 
H46B H 1.0898 0.8271 0.8208 0.192 Uiso 0.50 1 calc PR . . 
O14 O 0.991(4) 0.853(2) 0.894(2) 0.160(7) Uani 0.50 1 d PDU . . 
C47 C 0.909(4) 0.771(3) 0.874(3) 0.160(7) Uani 0.50 1 d PDU . . 
H47A H 0.8562 0.7629 0.9071 0.192 Uiso 0.50 1 calc PR . . 
H47B H 0.8417 0.7631 0.8328 0.192 Uiso 0.50 1 calc PR . . 
C48 C 1.003(5) 0.712(2) 0.867(3) 0.160(7) Uani 0.50 1 d PDU . . 
H48A H 0.9703 0.6682 0.8857 0.192 Uiso 0.50 1 calc PR . . 
H48B H 0.9866 0.6860 0.8195 0.192 Uiso 0.50 1 calc PR . . 
O15 O 1.672(6) 1.009(3) 0.849(3) 0.235(10) Uani 0.50 1 d PDU . . 
C49 C 1.528(7) 1.002(4) 0.825(3) 0.235(10) Uani 0.50 1 d PDU . . 
H49A H 1.5051 0.9825 0.7768 0.282 Uiso 0.50 1 calc PR . . 
H49B H 1.4989 1.0569 0.8375 0.282 Uiso 0.50 1 calc PR . . 
C50 C 1.456(6) 0.943(4) 0.852(3) 0.235(10) Uani 0.50 1 d PDU . . 
H50A H 1.4896 0.9582 0.8998 0.282 Uiso 0.50 1 calc PR . . 
H50B H 1.3552 0.9422 0.8420 0.282 Uiso 0.50 1 calc PR . . 
O16 O 1.488(6) 0.863(3) 0.824(3) 0.235(10) Uani 0.50 1 d PDU . . 
C51 C 1.633(7) 0.859(3) 0.841(4) 0.235(10) Uani 0.50 1 d PDU . . 
H51A H 1.6539 0.8075 0.8148 0.282 Uiso 0.50 1 calc PR . . 
H51B H 1.6601 0.8608 0.8872 0.282 Uiso 0.50 1 calc PR . . 
C52 C 1.711(5) 0.931(4) 0.829(3) 0.235(10) Uani 0.50 1 d PDU . . 
H52A H 1.8092 0.9356 0.8505 0.282 Uiso 0.50 1 calc PR . . 
H52B H 1.7059 0.9183 0.7820 0.282 Uiso 0.50 1 calc PR . . 
 
loop_ 
 _atom_site_aniso_label 
 _atom_site_aniso_U_11 
 _atom_site_aniso_U_22 
 _atom_site_aniso_U_33 
 _atom_site_aniso_U_23 
 _atom_site_aniso_U_13 
 _atom_site_aniso_U_12 
Ce1 0.0218(3) 0.0485(4) 0.0242(3) 0.0065(3) 0.0044(3) 0.0115(3) 
I1 0.0365(4) 0.0524(5) 0.0591(6) 0.0237(4) 0.0105(4) 0.0113(4) 
I2 0.0483(5) 0.0486(5) 0.0452(5) 0.0046(4) 0.0186(4) 0.0103(4) 
I3 0.0407(5) 0.0665(7) 0.0463(5) 0.0035(5) 0.0017(4) 0.0004(4) 
I4 0.0487(5) 0.0620(6) 0.0596(6) 0.0206(5) 0.0239(5) 0.0057(4) 
Cu1 0.0485(10) 0.0553(11) 0.0562(11) 0.0183(9) 0.0143(9) 0.0094(8) 
Cu2 0.0404(9) 0.0613(12) 0.0462(10) -0.0001(8) 0.0002(8) 0.0004(8) 
Cu3 0.0463(10) 0.0661(13) 0.0725(13) -0.0114(10) 0.0186(10) 0.0169(9) 
Cu4 0.0508(10) 0.0667(12) 0.0574(11) 0.0314(9) 0.0119(9) 0.0243(9) 
O1 0.035(5) 0.074(7) 0.038(5) 0.002(5) 0.006(4) 0.004(4) 
O2 0.034(5) 0.072(7) 0.036(5) 0.009(4) 0.005(4) 0.005(4) 
O3 0.036(5) 0.058(6) 0.051(6) -0.004(5) 0.003(4) 0.007(4) 
O4 0.041(5) 0.047(5) 0.044(5) -0.001(4) 0.005(4) 0.010(4) 
O5 0.046(5) 0.077(7) 0.040(5) 0.025(5) 0.014(4) 0.014(5) 
O6 0.049(6) 0.071(7) 0.053(6) 0.028(5) 0.003(5) 0.018(5) 
O7 0.049(6) 0.056(7) 0.120(10) 0.024(7) 0.041(7) 0.018(5) 
O8 0.072(7) 0.063(7) 0.078(8) 0.018(6) 0.026(7) 0.025(6) 
N1 0.044(6) 0.039(6) 0.037(6) -0.004(5) 0.002(5) -0.006(5) 
N2 0.033(6) 0.061(8) 0.060(8) -0.005(6) 0.010(6) 0.012(5) 
N3 0.050(7) 0.063(8) 0.063(8) 0.041(7) 0.019(6) 0.027(6) 
C1 0.061(9) 0.071(11) 0.047(9) -0.005(7) 0.019(8) 0.023(8) 
C2 0.028(6) 0.065(10) 0.048(8) -0.006(7) -0.003(6) 0.005(6) 
C3 0.035(6) 0.073(10) 0.027(7) 0.001(6) 0.002(6) 0.002(6) 
C4 0.032(6) 0.053(9) 0.052(8) -0.014(7) 0.006(6) -0.003(6) 
C5 0.025(6) 0.063(9) 0.052(8) 0.014(7) 0.000(6) 0.007(6) 
C6 0.030(6) 0.060(9) 0.027(6) 0.010(6) 0.001(5) 0.003(6) 
C7 0.016(5) 0.049(7) 0.024(6) 0.011(5) -0.002(4) 0.005(5) 
C8 0.029(6) 0.037(7) 0.032(6) 0.001(5) 0.011(5) 0.004(5) 
C9 0.020(5) 0.041(7) 0.043(7) 0.001(6) 0.006(5) -0.003(5) 
C10 0.045(7) 0.048(8) 0.041(7) 0.011(6) 0.016(6) 0.004(6) 
C11 0.033(6) 0.065(9) 0.030(7) 0.011(6) 0.009(6) 0.004(6) 
C12 0.024(5) 0.058(8) 0.024(6) 0.010(5) 0.007(5) 0.011(5) 
C13 0.036(7) 0.071(10) 0.051(9) -0.006(7) 0.012(7) 0.006(7) 
C14 0.048(7) 0.035(7) 0.048(8) -0.008(6) 0.009(7) -0.005(6) 
C15 0.032(6) 0.037(7) 0.038(7) -0.001(5) 0.009(5) 0.003(5) 
C16 0.034(7) 0.064(10) 0.055(9) -0.021(7) 0.021(7) -0.002(6) 
C17 0.041(8) 0.045(9) 0.086(12) -0.036(8) 0.012(8) -0.011(7) 
C18 0.048(7) 0.037(7) 0.036(7) -0.002(5) 0.010(6) 0.014(6) 
C19 0.034(6) 0.049(8) 0.034(7) 0.008(6) 0.007(6) 0.008(6) 
C20 0.024(5) 0.034(6) 0.031(6) 0.008(5) 0.000(5) 0.005(5) 
C21 0.052(8) 0.036(7) 0.062(9) 0.004(6) 0.025(7) 0.012(6) 
C22 0.046(8) 0.063(10) 0.051(9) -0.005(7) 0.009(7) 0.014(7) 
C23 0.042(7) 0.046(8) 0.040(7) 0.005(6) -0.007(6) 0.006(6) 
C24 0.035(7) 0.048(8) 0.042(7) 0.000(6) 0.014(6) 0.008(6) 
C25 0.059(10) 0.134(17) 0.094(14) 0.075(13) 0.039(10) 0.040(11) 
C26 0.046(8) 0.102(13) 0.083(12) 0.069(11) 0.028(9) 0.027(8) 
C27 0.042(7) 0.038(7) 0.049(8) 0.013(6) 0.003(6) 0.006(6) 
C28 0.030(6) 0.080(11) 0.052(9) 0.035(8) -0.004(6) 0.014(7) 
C29 0.047(8) 0.065(10) 0.060(10) 0.023(8) 0.004(7) 0.003(7) 
C30 0.035(6) 0.066(9) 0.050(8) 0.030(7) 0.016(6) 0.019(6) 
C31 0.030(6) 0.054(8) 0.040(7) 0.017(6) 0.000(6) 0.018(6) 
C32 0.040(7) 0.050(8) 0.033(7) 0.012(6) 0.010(6) 0.012(6) 
C33 0.038(7) 0.071(10) 0.056(9) 0.032(8) 0.010(7) 0.013(7) 
C34 0.066(10) 0.095(13) 0.081(12) 0.049(10) 0.049(10) 0.051(9) 
C35 0.060(4) 0.060(4) 0.060(4) 0.0166(14) 0.0134(13) 0.0103(12) 
C36 0.036(3) 0.036(3) 0.036(3) 0.0098(12) 0.0078(12) 0.0059(11) 
O9 0.145(4) 0.145(4) 0.145(4) 0.0395(10) 0.0321(9) 0.0241(7) 
C37 0.145(4) 0.145(4) 0.145(4) 0.0395(10) 0.0321(9) 0.0241(7) 
C38 0.145(4) 0.145(4) 0.145(4) 0.0395(10) 0.0321(9) 0.0241(7) 
O10 0.145(4) 0.145(4) 0.145(4) 0.0395(10) 0.0321(9) 0.0241(7) 
C39 0.145(4) 0.145(4) 0.145(4) 0.0395(10) 0.0321(9) 0.0241(7) 
C40 0.145(4) 0.145(4) 0.145(4) 0.0395(10) 0.0321(9) 0.0241(7) 
O11 0.141(6) 0.141(6) 0.141(6) 0.0384(17) 0.0313(14) 0.0236(11) 
C41 0.141(6) 0.141(6) 0.141(6) 0.0384(17) 0.0313(14) 0.0236(11) 
C42 0.141(6) 0.141(6) 0.141(6) 0.0384(17) 0.0313(14) 0.0236(11) 
O12 0.141(6) 0.141(6) 0.141(6) 0.0384(17) 0.0313(14) 0.0236(11) 
C43 0.141(6) 0.141(6) 0.141(6) 0.0384(17) 0.0313(14) 0.0236(11) 
C44 0.141(6) 0.141(6) 0.141(6) 0.0384(17) 0.0313(14) 0.0236(11) 
O13 0.160(7) 0.160(7) 0.160(7) 0.0435(19) 0.0353(16) 0.0267(12) 
C45 0.160(7) 0.160(7) 0.160(7) 0.0435(19) 0.0353(16) 0.0267(12) 
C46 0.160(7) 0.160(7) 0.160(7) 0.0435(19) 0.0353(16) 0.0267(12) 
O14 0.160(7) 0.160(7) 0.160(7) 0.0435(19) 0.0353(16) 0.0267(12) 
C47 0.160(7) 0.160(7) 0.160(7) 0.0435(19) 0.0353(16) 0.0267(12) 
C48 0.160(7) 0.160(7) 0.160(7) 0.0435(19) 0.0353(16) 0.0267(12) 
O15 0.235(10) 0.235(10) 0.235(10) 0.064(3) 0.052(2) 0.0392(16) 
C49 0.235(10) 0.235(10) 0.235(10) 0.064(3) 0.052(2) 0.0392(16) 
C50 0.235(10) 0.235(10) 0.235(10) 0.064(3) 0.052(2) 0.0392(16) 
O16 0.235(10) 0.235(10) 0.235(10) 0.064(3) 0.052(2) 0.0392(16) 
C51 0.235(10) 0.235(10) 0.235(10) 0.064(3) 0.052(2) 0.0392(16) 
C52 0.235(10) 0.235(10) 0.235(10) 0.064(3) 0.052(2) 0.0392(16) 
 
_geom_special_details 
; 
 All esds (except the esd in the dihedral angle between two l.s. planes) 
 are estimated using the full covariance matrix.  The cell esds are taken 
 into account individually in the estimation of esds in distances, angles 
 and torsion angles; correlations between esds in cell parameters are only 
 used when they are defined by crystal symmetry.  An approximate (isotropic) 
 treatment of cell esds is used for estimating esds involving l.s. planes. 
; 
 
loop_ 
 _geom_bond_atom_site_label_1 
 _geom_bond_atom_site_label_2 
 _geom_bond_distance 
 _geom_bond_site_symmetry_2 
 _geom_bond_publ_flag 
Ce1 O6 2.405(10) 2_766 ? 
Ce1 O2 2.412(9) 2_565 ? 
Ce1 O3 2.422(9) 2_676 ? 
Ce1 O1 2.433(8) . ? 
Ce1 O4 2.435(8) 1_544 ? 
Ce1 O5 2.462(9) 1_454 ? 
Ce1 O7 2.559(10) . ? 
Ce1 O8 2.690(10) . ? 
I1 Cu1 2.696(2) 2_776 ? 
I1 Cu1 2.701(2) . ? 
I1 Cu2 2.732(2) . ? 
I1 Cu3 2.851(3) . ? 
I2 Cu2 2.635(2) . ? 
I2 Cu4 2.708(2) . ? 
I2 Cu1 2.716(2) . ? 
I3 Cu3 2.569(2) . ? 
I3 Cu1 2.694(2) . ? 
I3 Cu4 2.763(3) . ? 
I4 Cu4 2.642(2) . ? 
I4 Cu3 2.682(2) . ? 
I4 Cu2 2.717(2) . ? 
Cu1 I1 2.696(2) 2_776 ? 
Cu1 Cu4 2.714(3) . ? 
Cu1 Cu3 2.793(3) . ? 
Cu1 Cu1 2.838(4) 2_776 ? 
Cu1 Cu2 2.842(3) . ? 
Cu2 N1 2.016(10) . ? 
Cu2 Cu4 2.654(3) . ? 
Cu2 Cu3 2.719(3) . ? 
Cu3 N2 2.026(10) . ? 
Cu3 Cu4 2.670(3) . ? 
Cu4 N3 2.023(11) . ? 
O1 C12 1.297(13) . ? 
O2 C12 1.260(14) . ? 
O2 Ce1 2.412(9) 2_565 ? 
O3 C24 1.283(15) . ? 
O3 Ce1 2.422(9) 2_676 ? 
O4 C24 1.268(14) . ? 
O4 Ce1 2.435(8) 1_566 ? 
O5 C36 1.276(14) . ? 
O5 Ce1 2.462(9) 1_656 ? 
O6 C36 1.255(15) . ? 
O6 Ce1 2.405(10) 2_766 ? 
O7 H7A 0.997(17) . ? 
O7 H7B 1.000(17) . ? 
O8 H8A 0.951(18) . ? 
O8 H8B 0.957(18) . ? 
N1 C1 1.332(17) . ? 
N1 C5 1.333(16) . ? 
N2 C17 1.320(17) . ? 
N2 C13 1.366(18) . ? 
N3 C29 1.361(18) . ? 
N3 C25 1.371(19) . ? 
C1 C2 1.378(19) . ? 
C1 H1 0.9300 . ? 
C2 C3 1.399(18) . ? 
C2 H2 0.9300 . ? 
C3 C4 1.392(18) . ? 
C3 C6 1.486(17) . ? 
C4 C5 1.384(17) . ? 
C4 H4 0.9300 . ? 
C5 H5 0.9300 . ? 
C6 C7 1.389(15) . ? 
C6 C11 1.411(16) . ? 
C7 C8 1.385(15) . ? 
C7 H7 0.9300 . ? 
C8 C9 1.407(15) . ? 
C8 C12 1.487(15) . ? 
C9 C10 1.367(17) . ? 
C9 H9 0.9300 . ? 
C10 C11 1.378(18) . ? 
C10 H10 0.9300 . ? 
C11 H11 0.9300 . ? 
C13 C14 1.325(18) . ? 
C13 H13 0.9300 . ? 
C14 C15 1.409(18) . ? 
C14 H14 0.9300 . ? 
C15 C16 1.454(17) . ? 
C15 C18 1.483(16) . ? 
C16 C17 1.362(18) . ? 
C16 H16 0.9300 . ? 
C17 H17 0.9300 . ? 
C18 C23 1.401(18) . ? 
C18 C19 1.416(16) . ? 
C19 C20 1.373(15) . ? 
C19 H19 0.9300 . ? 
C20 C21 1.386(18) . ? 
C20 C24 1.488(16) . ? 
C21 C22 1.374(19) . ? 
C21 H21 0.9300 . ? 
C22 C23 1.386(18) . ? 
C22 H22 0.9300 . ? 
C23 H23 0.9300 . ? 
C25 C26 1.38(2) . ? 
C25 H25 0.9300 . ? 
C26 C27 1.392(18) . ? 
C26 H26 0.9300 . ? 
C27 C28 1.376(18) . ? 
C27 C30 1.499(18) . ? 
C28 C29 1.332(19) . ? 
C28 H28 0.9300 . ? 
C29 H29 0.9300 . ? 
C30 C31 1.401(18) . ? 
C30 C35 1.417(19) . ? 
C31 C32 1.396(17) . ? 
C31 H31 0.9300 . ? 
C32 C33 1.373(17) . ? 
C32 C36 1.508(17) . ? 
C33 C34 1.45(2) . ? 
C33 H33 0.9300 . ? 
C34 C35 1.37(2) . ? 
C34 H34 0.9300 . ? 
C35 H35 0.9300 . ? 
O9 C37 1.393(16) . ? 
O9 C40 1.409(16) . ? 
C37 C38 1.449(17) . ? 
C37 H37A 0.9700 . ? 
C37 H37B 0.9700 . ? 
C38 O10 1.430(16) . ? 
C38 H38A 0.9700 . ? 
C38 H38B 0.9700 . ? 
O10 C39 1.435(16) . ? 
C39 C40 1.445(17) . ? 
C39 H39A 0.9700 . ? 
C39 H39B 0.9700 . ? 
C40 H40A 0.9700 . ? 
C40 H40B 0.9700 . ? 
O11 C44 1.36(2) . ? 
O11 C41 1.38(2) . ? 
C41 C42 1.45(2) . ? 
C41 H41A 0.9700 . ? 
C41 H41B 0.9700 . ? 
C42 O12 1.40(2) . ? 
C42 H42A 0.9700 . ? 
C42 H42B 0.9700 . ? 
O12 C43 1.41(2) . ? 
C43 C44 1.42(2) . ? 
C43 H43A 0.9700 . ? 
C43 H43B 0.9700 . ? 
C44 H44A 0.9700 . ? 
C44 H44B 0.9700 . ? 
O13 C48 1.35(2) . ? 
O13 C45 1.38(2) . ? 
C45 C46 1.46(2) . ? 
C45 H45A 0.9700 . ? 
C45 H45B 0.9700 . ? 
C46 O14 1.41(2) . ? 
C46 H46A 0.9700 . ? 
C46 H46B 0.9700 . ? 
O14 C47 1.42(2) . ? 
C47 C48 1.42(2) . ? 
C47 H47A 0.9700 . ? 
C47 H47B 0.9700 . ? 
C48 H48A 0.9700 . ? 
C48 H48B 0.9700 . ? 
O15 C52 1.38(2) . ? 
O15 C49 1.38(2) . ? 
C49 C50 1.45(2) . ? 
C49 H49A 0.9700 . ? 
C49 H49B 0.9700 . ? 
C50 O16 1.41(2) . ? 
C50 H50A 0.9700 . ? 
C50 H50B 0.9700 . ? 
O16 C51 1.41(2) . ? 
C51 C52 1.43(2) . ? 
C51 H51A 0.9700 . ? 
C51 H51B 0.9700 . ? 
C52 H52A 0.9700 . ? 
C52 H52B 0.9700 . ? 
 
loop_ 
 _geom_angle_atom_site_label_1 
 _geom_angle_atom_site_label_2 
 _geom_angle_atom_site_label_3 
 _geom_angle 
 _geom_angle_site_symmetry_1 
 _geom_angle_site_symmetry_3 
 _geom_angle_publ_flag 
O6 Ce1 O2 149.1(3) 2_766 2_565 ? 
O6 Ce1 O3 74.0(3) 2_766 2_676 ? 
O2 Ce1 O3 135.2(3) 2_565 2_676 ? 
O6 Ce1 O1 84.2(3) 2_766 . ? 
O2 Ce1 O1 91.8(3) 2_565 . ? 
O3 Ce1 O1 78.8(3) 2_676 . ? 
O6 Ce1 O4 79.1(3) 2_766 1_544 ? 
O2 Ce1 O4 87.2(3) 2_565 1_544 ? 
O3 Ce1 O4 124.5(3) 2_676 1_544 ? 
O1 Ce1 O4 145.0(3) . 1_544 ? 
O6 Ce1 O5 122.5(3) 2_766 1_454 ? 
O2 Ce1 O5 79.0(3) 2_565 1_454 ? 
O3 Ce1 O5 80.6(3) 2_676 1_454 ? 
O1 Ce1 O5 139.5(3) . 1_454 ? 
O4 Ce1 O5 74.4(3) 1_544 1_454 ? 
O6 Ce1 O7 76.5(4) 2_766 . ? 
O2 Ce1 O7 73.0(4) 2_565 . ? 
O3 Ce1 O7 141.2(4) 2_676 . ? 
O1 Ce1 O7 73.6(3) . . ? 
O4 Ce1 O7 72.7(3) 1_544 . ? 
O5 Ce1 O7 137.3(4) 1_454 . ? 
O6 Ce1 O8 137.9(4) 2_766 . ? 
O2 Ce1 O8 67.3(3) 2_565 . ? 
O3 Ce1 O8 68.2(3) 2_676 . ? 
O1 Ce1 O8 70.9(3) . . ? 
O4 Ce1 O8 138.6(3) 1_544 . ? 
O5 Ce1 O8 69.2(3) 1_454 . ? 
O7 Ce1 O8 124.8(3) . . ? 
Cu1 I1 Cu1 63.46(7) 2_776 . ? 
Cu1 I1 Cu2 115.35(6) 2_776 . ? 
Cu1 I1 Cu2 63.09(6) . . ? 
Cu1 I1 Cu3 117.19(7) 2_776 . ? 
Cu1 I1 Cu3 60.33(6) . . ? 
Cu2 I1 Cu3 58.25(6) . . ? 
Cu2 I2 Cu4 59.54(6) . . ? 
Cu2 I2 Cu1 64.15(6) . . ? 
Cu4 I2 Cu1 60.05(6) . . ? 
Cu3 I3 Cu1 64.04(7) . . ? 
Cu3 I3 Cu4 59.96(7) . . ? 
Cu1 I3 Cu4 59.63(6) . . ? 
Cu4 I4 Cu3 60.20(6) . . ? 
Cu4 I4 Cu2 59.35(6) . . ? 
Cu3 I4 Cu2 60.48(7) . . ? 
I3 Cu1 I1 106.51(8) . 2_776 ? 
I3 Cu1 I1 110.95(7) . . ? 
I1 Cu1 I1 116.54(7) 2_776 . ? 
I3 Cu1 Cu4 61.46(7) . . ? 
I1 Cu1 Cu4 134.72(8) 2_776 . ? 
I1 Cu1 Cu4 108.12(7) . . ? 
I3 Cu1 I2 117.41(8) . . ? 
I1 Cu1 I2 99.41(7) 2_776 . ? 
I1 Cu1 I2 105.95(8) . . ? 
Cu4 Cu1 I2 59.84(6) . . ? 
I3 Cu1 Cu3 55.82(6) . . ? 
I1 Cu1 Cu3 153.98(9) 2_776 . ? 
I1 Cu1 Cu3 62.50(6) . . ? 
Cu4 Cu1 Cu3 57.99(7) . . ? 
I2 Cu1 Cu3 105.79(8) . . ? 
I3 Cu1 Cu1 127.60(11) . 2_776 ? 
I1 Cu1 Cu1 58.36(6) 2_776 2_776 ? 
I1 Cu1 Cu1 58.18(7) . 2_776 ? 
Cu4 Cu1 Cu1 164.64(12) . 2_776 ? 
I2 Cu1 Cu1 114.64(10) . 2_776 ? 
Cu3 Cu1 Cu1 114.47(10) . 2_776 ? 
I3 Cu1 Cu2 105.29(8) . . ? 
I1 Cu1 Cu2 146.74(8) 2_776 . ? 
I1 Cu1 Cu2 58.99(6) . . ? 
Cu4 Cu1 Cu2 57.01(7) . . ? 
I2 Cu1 Cu2 56.54(6) . . ? 
Cu3 Cu1 Cu2 57.69(7) . . ? 
Cu1 Cu1 Cu2 107.69(10) 2_776 . ? 
N1 Cu2 I2 111.8(3) . . ? 
N1 Cu2 Cu4 145.1(3) . . ? 
I2 Cu2 Cu4 61.61(6) . . ? 
N1 Cu2 I4 100.8(3) . . ? 
I2 Cu2 I4 113.70(8) . . ? 
Cu4 Cu2 I4 58.93(6) . . ? 
N1 Cu2 Cu3 137.9(3) . . ? 
I2 Cu2 Cu3 110.29(8) . . ? 
Cu4 Cu2 Cu3 59.59(7) . . ? 
I4 Cu2 Cu3 59.12(7) . . ? 
N1 Cu2 I1 105.7(3) . . ? 
I2 Cu2 I1 107.37(7) . . ? 
Cu4 Cu2 I1 108.98(8) . . ? 
I4 Cu2 I1 117.13(7) . . ? 
Cu3 Cu2 I1 63.07(7) . . ? 
N1 Cu2 Cu1 151.0(3) . . ? 
I2 Cu2 Cu1 59.31(6) . . ? 
Cu4 Cu2 Cu1 59.07(7) . . ? 
I4 Cu2 Cu1 108.02(8) . . ? 
Cu3 Cu2 Cu1 60.24(7) . . ? 
I1 Cu2 Cu1 57.93(6) . . ? 
N2 Cu3 I3 114.7(3) . . ? 
N2 Cu3 Cu4 159.7(4) . . ? 
I3 Cu3 Cu4 63.63(7) . . ? 
N2 Cu3 I4 108.1(4) . . ? 
I3 Cu3 I4 113.82(9) . . ? 
Cu4 Cu3 I4 59.17(6) . . ? 
N2 Cu3 Cu2 131.4(3) . . ? 
I3 Cu3 Cu2 112.63(8) . . ? 
Cu4 Cu3 Cu2 59.00(7) . . ? 
I4 Cu3 Cu2 60.40(7) . . ? 
N2 Cu3 Cu1 139.1(4) . . ? 
I3 Cu3 Cu1 60.14(6) . . ? 
Cu4 Cu3 Cu1 59.53(7) . . ? 
I4 Cu3 Cu1 110.49(8) . . ? 
Cu2 Cu3 Cu1 62.07(7) . . ? 
N2 Cu3 I1 94.5(4) . . ? 
I3 Cu3 I1 110.05(8) . . ? 
Cu4 Cu3 I1 105.09(8) . . ? 
I4 Cu3 I1 114.30(8) . . ? 
Cu2 Cu3 I1 58.68(7) . . ? 
Cu1 Cu3 I1 57.17(6) . . ? 
N3 Cu4 I4 115.2(3) . . ? 
N3 Cu4 Cu2 150.7(4) . . ? 
I4 Cu4 Cu2 61.72(6) . . ? 
N3 Cu4 Cu3 145.7(4) . . ? 
I4 Cu4 Cu3 60.63(6) . . ? 
Cu2 Cu4 Cu3 61.42(7) . . ? 
N3 Cu4 I2 103.0(3) . . ? 
I4 Cu4 I2 113.72(8) . . ? 
Cu2 Cu4 I2 58.85(6) . . ? 
Cu3 Cu4 I2 109.54(8) . . ? 
N3 Cu4 Cu1 130.3(3) . . ? 
I4 Cu4 Cu1 114.23(8) . . ? 
Cu2 Cu4 Cu1 63.93(7) . . ? 
Cu3 Cu4 Cu1 62.48(7) . . ? 
I2 Cu4 Cu1 60.11(6) . . ? 
N3 Cu4 I3 99.9(4) . . ? 
I4 Cu4 I3 108.95(7) . . ? 
Cu2 Cu4 I3 108.65(8) . . ? 
Cu3 Cu4 I3 56.41(6) . . ? 
I2 Cu4 I3 115.29(8) . . ? 
Cu1 Cu4 I3 58.91(6) . . ? 
C12 O1 Ce1 141.0(8) . . ? 
C12 O2 Ce1 153.6(9) . 2_565 ? 
C24 O3 Ce1 136.6(8) . 2_676 ? 
C24 O4 Ce1 145.0(8) . 1_566 ? 
C36 O5 Ce1 118.4(8) . 1_656 ? 
C36 O6 Ce1 170.3(9) . 2_766 ? 
Ce1 O7 H7A 127.7(18) . . ? 
Ce1 O7 H7B 128.3(19) . . ? 
H7A O7 H7B 103.9(18) . . ? 
Ce1 O8 H8A 123.0(19) . . ? 
Ce1 O8 H8B 121.4(19) . . ? 
H8A O8 H8B 113(2) . . ? 
C1 N1 C5 116.0(11) . . ? 
C1 N1 Cu2 120.6(9) . . ? 
C5 N1 Cu2 123.4(9) . . ? 
C17 N2 C13 116.3(11) . . ? 
C17 N2 Cu3 118.3(9) . . ? 
C13 N2 Cu3 125.2(9) . . ? 
C29 N3 C25 116.5(13) . . ? 
C29 N3 Cu4 125.0(9) . . ? 
C25 N3 Cu4 118.0(10) . . ? 
N1 C1 C2 123.2(12) . . ? 
N1 C1 H1 118.4 . . ? 
C2 C1 H1 118.4 . . ? 
C1 C2 C3 120.4(12) . . ? 
C1 C2 H2 119.8 . . ? 
C3 C2 H2 119.8 . . ? 
C4 C3 C2 116.4(11) . . ? 
C4 C3 C6 121.6(11) . . ? 
C2 C3 C6 121.9(11) . . ? 
C5 C4 C3 118.3(12) . . ? 
C5 C4 H4 120.8 . . ? 
C3 C4 H4 120.8 . . ? 
N1 C5 C4 125.3(12) . . ? 
N1 C5 H5 117.3 . . ? 
C4 C5 H5 117.3 . . ? 
C7 C6 C11 117.4(11) . . ? 
C7 C6 C3 120.3(10) . . ? 
C11 C6 C3 122.3(11) . . ? 
C8 C7 C6 121.5(10) . . ? 
C8 C7 H7 119.3 . . ? 
C6 C7 H7 119.3 . . ? 
C7 C8 C9 119.4(10) . . ? 
C7 C8 C12 121.5(9) . . ? 
C9 C8 C12 119.1(10) . . ? 
C10 C9 C8 119.9(11) . . ? 
C10 C9 H9 120.1 . . ? 
C8 C9 H9 120.1 . . ? 
C9 C10 C11 120.3(11) . . ? 
C9 C10 H10 119.9 . . ? 
C11 C10 H10 119.9 . . ? 
C10 C11 C6 121.4(11) . . ? 
C10 C11 H11 119.3 . . ? 
C6 C11 H11 119.3 . . ? 
O2 C12 O1 122.8(10) . . ? 
O2 C12 C8 119.8(9) . . ? 
O1 C12 C8 117.3(10) . . ? 
C14 C13 N2 123.2(13) . . ? 
C14 C13 H13 118.4 . . ? 
N2 C13 H13 118.4 . . ? 
C13 C14 C15 121.8(12) . . ? 
C13 C14 H14 119.1 . . ? 
C15 C14 H14 119.1 . . ? 
C14 C15 C16 115.2(10) . . ? 
C14 C15 C18 126.1(11) . . ? 
C16 C15 C18 118.7(11) . . ? 
C17 C16 C15 117.2(12) . . ? 
C17 C16 H16 121.4 . . ? 
C15 C16 H16 121.4 . . ? 
N2 C17 C16 126.3(13) . . ? 
N2 C17 H17 116.9 . . ? 
C16 C17 H17 116.9 . . ? 
C23 C18 C19 118.2(11) . . ? 
C23 C18 C15 120.2(11) . . ? 
C19 C18 C15 121.5(12) . . ? 
C20 C19 C18 120.9(12) . . ? 
C20 C19 H19 119.5 . . ? 
C18 C19 H19 119.5 . . ? 
C19 C20 C21 119.2(11) . . ? 
C19 C20 C24 120.5(11) . . ? 
C21 C20 C24 120.3(10) . . ? 
C22 C21 C20 121.4(12) . . ? 
C22 C21 H21 119.3 . . ? 
C20 C21 H21 119.3 . . ? 
C21 C22 C23 119.8(14) . . ? 
C21 C22 H22 120.1 . . ? 
C23 C22 H22 120.1 . . ? 
C22 C23 C18 120.3(12) . . ? 
C22 C23 H23 119.8 . . ? 
C18 C23 H23 119.8 . . ? 
O4 C24 O3 125.4(11) . . ? 
O4 C24 C20 117.2(11) . . ? 
O3 C24 C20 117.4(10) . . ? 
N3 C25 C26 121.1(15) . . ? 
N3 C25 H25 119.5 . . ? 
C26 C25 H25 119.5 . . ? 
C25 C26 C27 121.0(13) . . ? 
C25 C26 H26 119.5 . . ? 
C27 C26 H26 119.5 . . ? 
C28 C27 C26 116.1(13) . . ? 
C28 C27 C30 123.0(12) . . ? 
C26 C27 C30 120.8(12) . . ? 
C29 C28 C27 121.7(14) . . ? 
C29 C28 H28 119.2 . . ? 
C27 C28 H28 119.2 . . ? 
C28 C29 N3 123.5(14) . . ? 
C28 C29 H29 118.2 . . ? 
N3 C29 H29 118.2 . . ? 
C31 C30 C35 119.9(13) . . ? 
C31 C30 C27 118.7(10) . . ? 
C35 C30 C27 121.4(12) . . ? 
C32 C31 C30 120.0(11) . . ? 
C32 C31 H31 120.0 . . ? 
C30 C31 H31 120.0 . . ? 
C33 C32 C31 121.3(12) . . ? 
C33 C32 C36 119.6(12) . . ? 
C31 C32 C36 119.1(11) . . ? 
C32 C33 C34 118.5(13) . . ? 
C32 C33 H33 120.8 . . ? 
C34 C33 H33 120.8 . . ? 
C35 C34 C33 120.4(12) . . ? 
C35 C34 H34 119.8 . . ? 
C33 C34 H34 119.8 . . ? 
C34 C35 C30 119.7(14) . . ? 
C34 C35 H35 120.2 . . ? 
C30 C35 H35 120.2 . . ? 
O6 C36 O5 124.1(11) . . ? 
O6 C36 C32 118.6(10) . . ? 
O5 C36 C32 117.3(11) . . ? 
C37 O9 C40 108(2) . . ? 
O9 C37 C38 111(2) . . ? 
O9 C37 H37A 109.5 . . ? 
C38 C37 H37A 109.5 . . ? 
O9 C37 H37B 109.5 . . ? 
C38 C37 H37B 109.5 . . ? 
H37A C37 H37B 108.1 . . ? 
O10 C38 C37 108(2) . . ? 
O10 C38 H38A 110.1 . . ? 
C37 C38 H38A 110.1 . . ? 
O10 C38 H38B 110.1 . . ? 
C37 C38 H38B 110.1 . . ? 
H38A C38 H38B 108.5 . . ? 
C38 O10 C39 112.5(19) . . ? 
O10 C39 C40 109(2) . . ? 
O10 C39 H39A 109.9 . . ? 
C40 C39 H39A 109.9 . . ? 
O10 C39 H39B 109.9 . . ? 
C40 C39 H39B 109.9 . . ? 
H39A C39 H39B 108.3 . . ? 
O9 C40 C39 116(2) . . ? 
O9 C40 H40A 108.2 . . ? 
C39 C40 H40A 108.2 . . ? 
O9 C40 H40B 108.2 . . ? 
C39 C40 H40B 108.2 . . ? 
H40A C40 H40B 107.4 . . ? 
C44 O11 C41 114(3) . . ? 
O11 C41 C42 110(3) . . ? 
O11 C41 H41A 109.7 . . ? 
C42 C41 H41A 109.7 . . ? 
O11 C41 H41B 109.7 . . ? 
C42 C41 H41B 109.7 . . ? 
H41A C41 H41B 108.2 . . ? 
O12 C42 C41 108(3) . . ? 
O12 C42 H42A 110.1 . . ? 
C41 C42 H42A 110.1 . . ? 
O12 C42 H42B 110.1 . . ? 
C41 C42 H42B 110.1 . . ? 
H42A C42 H42B 108.4 . . ? 
C42 O12 C43 113(3) . . ? 
O12 C43 C44 109(3) . . ? 
O12 C43 H43A 109.9 . . ? 
C44 C43 H43A 109.9 . . ? 
O12 C43 H43B 109.9 . . ? 
C44 C43 H43B 109.9 . . ? 
H43A C43 H43B 108.3 . . ? 
O11 C44 C43 126(3) . . ? 
O11 C44 H44A 105.7 . . ? 
C43 C44 H44A 105.7 . . ? 
O11 C44 H44B 105.7 . . ? 
C43 C44 H44B 105.7 . . ? 
H44A C44 H44B 106.2 . . ? 
C48 O13 C45 115(3) . . ? 
O13 C45 C46 109(3) . . ? 
O13 C45 H45A 109.9 . . ? 
C46 C45 H45A 109.9 . . ? 
O13 C45 H45B 109.9 . . ? 
C46 C45 H45B 109.9 . . ? 
H45A C45 H45B 108.3 . . ? 
O14 C46 C45 102(3) . . ? 
O14 C46 H46A 111.3 . . ? 
C45 C46 H46A 111.3 . . ? 
O14 C46 H46B 111.3 . . ? 
C45 C46 H46B 111.3 . . ? 
H46A C46 H46B 109.2 . . ? 
C46 O14 C47 112(3) . . ? 
C48 C47 O14 107(3) . . ? 
C48 C47 H47A 110.2 . . ? 
O14 C47 H47A 110.2 . . ? 
C48 C47 H47B 110.2 . . ? 
O14 C47 H47B 110.2 . . ? 
H47A C47 H47B 108.5 . . ? 
O13 C48 C47 126(3) . . ? 
O13 C48 H48A 105.8 . . ? 
C47 C48 H48A 105.8 . . ? 
O13 C48 H48B 105.8 . . ? 
C47 C48 H48B 105.8 . . ? 
H48A C48 H48B 106.2 . . ? 
C52 O15 C49 109(3) . . ? 
O15 C49 C50 107(3) . . ? 
O15 C49 H49A 110.3 . . ? 
C50 C49 H49A 110.3 . . ? 
O15 C49 H49B 110.3 . . ? 
C50 C49 H49B 110.3 . . ? 
H49A C49 H49B 108.5 . . ? 
O16 C50 C49 106(3) . . ? 
O16 C50 H50A 110.4 . . ? 
C49 C50 H50A 110.4 . . ? 
O16 C50 H50B 110.4 . . ? 
C49 C50 H50B 110.4 . . ? 
H50A C50 H50B 108.6 . . ? 
C50 O16 C51 113(3) . . ? 
O16 C51 C52 108(3) . . ? 
O16 C51 H51A 110.2 . . ? 
C52 C51 H51A 110.2 . . ? 
O16 C51 H51B 110.2 . . ? 
C52 C51 H51B 110.2 . . ? 
H51A C51 H51B 108.5 . . ? 
O15 C52 C51 119(3) . . ? 
O15 C52 H52A 107.6 . . ? 
C51 C52 H52A 107.6 . . ? 
O15 C52 H52B 107.6 . . ? 
C51 C52 H52B 107.6 . . ? 
H52A C52 H52B 107.0 . . ? 
 
loop_ 
 _geom_hbond_atom_site_label_D 
 _geom_hbond_atom_site_label_H 
 _geom_hbond_atom_site_label_A 
 _geom_hbond_distance_DH 
 _geom_hbond_distance_HA 
 _geom_hbond_distance_DA 
 _geom_hbond_angle_DHA 
 _geom_hbond_site_symmetry_A 
O7 H7A O8  0.997(17) 2.15(6) 3.047(15) 148(9) 2_565 
O7 H7A O2  0.997(17) 2.37(4) 3.051(13) 124(3) . 
O7 H7B O12  1.000(17) 1.78(4) 2.77(3) 171(5) . 
O8 H8B O13  0.957(18) 2.10(5) 3.02(4) 162(10) 1_454 
 
_diffrn_measured_fraction_theta_max    0.963 
_diffrn_reflns_theta_full              27.44 
_diffrn_measured_fraction_theta_full   0.963 
_refine_diff_density_max    1.244 
_refine_diff_density_min   -0.942 
_refine_diff_density_rms    0.206 
